# Supplementary material for: Properties and Mechanism of Hydroxyapatite Coating Prepared by Electrodeposition on a Braid for Biodegradable Bone Scaffolds
Source: PubMed Central journal article supplement (PMC6567105; doi:10.3390/nano9050679), 2019-05-02
Supplement: nanomaterials-09-00679-s001.pdf [file nanomaterials-09-00679-s001.pdf]

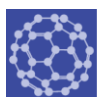

# Supporting Information

## Properties and Mechanism of Hydroxyapatite Coating Prepared by Electrodeposition on a Braid for Biodegradable Bone Scaffolds

Ting-Ting Li <sup>1,2,3</sup>, Lei Ling <sup>1</sup>, Mei-Chen Lin <sup>4,5</sup>, Qian Jiang <sup>1,2</sup>, Qi Lin <sup>6</sup>, Jia-Horng Lin <sup>1,3,4,5,7,8,9,\*</sup> and Ching-Wen Lou <sup>3,7,8,10,11,\*</sup>

<sup>1</sup> Innovation Platform of Intelligent and Energy-Saving Textiles, School of Textile Science and Engineering, Tianjin Polytechnic University, Tianjin 300387, China; tingtingli@tjpu.edu.cn (T.-T.L.); 1731015027@stu.tjpu.edu.cn (L.L.); jiangqian@tjpu.edu.cn (Q.J.)

<sup>2</sup> Tianjin and Ministry of Education Key Laboratory for Advanced Textile Composite Materials, Tianjin Polytechnic University, Tianjin 300387, China

<sup>3</sup> Fujian Key Laboratory of Novel Functional Fibers and Materials, Minjiang University, Fuzhou 350108, China

<sup>4</sup> School of Chinese Medicine, China Medical University, Taichung 40402, Taiwan; ritalin2870@mail.fcu.edu.tw

<sup>5</sup> Laboratory of Fiber Application and Manufacturing, Department of Fiber and Composite Materials, Feng Chia University, Taichung 40724, Taiwan

<sup>6</sup> Fujian Engineering Research Center of New Chinese Lacquer Material, Minjiang University, Fuzhou 350108, China; linqi@mju.edu.cn

<sup>7</sup> Ocean College, Minjiang University, Fuzhou 350108, China

<sup>8</sup> College of Textile and Clothing, Qingdao University, Shandong 266071, China

<sup>9</sup> Department of Fashion Design, Asia University, Taichung 41354, Taiwan

<sup>10</sup> Department of Bioinformatics and Medical Engineering, Asia University, Taichung 41354, Taiwan

<sup>11</sup> Department of Medical Research, China Medical University Hospital, China Medical University, Taichung 40402, Taiwan

\* Correspondence: jhlin@fcu.edu.tw (J.-H.L.); cwlou@asia.edu.tw (C.-W.L.); Tel.: +886-424-518-661 (J.-H.L.)

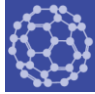**Table S1.** The Ca/P ratio of HA coatings obtained by electrodeposition in the past two years by other authors.

| Substrate      | Electrolyte                                                                                                                                                                                                                          | Current Density/Voltage                                                | Temperature     | Time                | PH value | Ca/P Ratio* | Ref. |
|----------------|--------------------------------------------------------------------------------------------------------------------------------------------------------------------------------------------------------------------------------------|------------------------------------------------------------------------|-----------------|---------------------|----------|-------------|------|
| Ti disc        | 0.61 mM $\text{NH}_4\text{H}_2\text{PO}_4$ and 0.36 mM $\text{Ca}(\text{NO}_3)_2 \cdot 4\text{H}_2\text{O}$                                                                                                                          | potentiodynamic mode, from $-1.4$ V to $0$ V, scanning rate $0.2$ mV/s | $50/75$ °C      | 2 h                 | 5        | 1.63        | [S1] |
| Ti64 alloy     | $\text{Ca}(\text{NO}_3)_2\text{NH}_4\text{H}_2\text{PO}_4$ Electrolyte resistivity was $18$ M $\Omega$ -cm at $25$ °C                                                                                                                | potentiodynamic mode, from $-1.4$ V to $0$ V, scanning rate $0.2$ mV/s | $75 \pm 0.5$ °C | 2 h                 | 5/6      | 1.51        | [S2] |
| Ti             | $0.008$ M $\text{Ca}(\text{NO}_3)_2 \cdot 4\text{H}_2\text{O}$ , $0.005$ M $\text{NH}_4\text{H}_2\text{PO}_4$ , $1$ M $\text{NaNO}_3$ and $6$ mL/L $\text{H}_2\text{O}_2$                                                            | $15$ mA/cm <sup>2</sup>                                                | $65 \pm 2$ °C   | ---                 | 6        | 1.64        | [S3] |
| Carbon fibers  | $3.80 \times 10^{-4}$ M $\text{NH}_4\text{H}_2\text{PO}_4$ , $6.35 \times 10^{-4}$ M $\text{Ca}(\text{NO}_3)_2$ and $0.1$ mol/L $\text{NaNO}_3$                                                                                      | $1.0, 3.0, 5.0, 7.0$ and $9.0$ mA                                      | $98.4$ °C       | $60, 120, 180$ mins | 6        | 1.57        | [S4] |
| Nitinol alloy  | $0.042$ M $\text{Ca}(\text{NO}_3)_2$ , $0.025$ M $(\text{NH}_4)_2\text{HPO}_4$ , $6$ mL/L $\text{H}_2\text{O}_2$ / $0.008$ M $\text{Ca}(\text{NO}_3)_2$ , $0.0005$ M $(\text{NH}_4)_2\text{HPO}_4$ , $6$ mL/L $\text{H}_2\text{O}_2$ | $1.5, 3, 5$ mA/cm <sup>2</sup> , $1.5, 5, 15$ mA/cm <sup>2</sup>       | $70 \pm 1$ °C   | 25 min              | 6        | 1.70        | [S5] |
| Titanium plate | $0.0006$ M $\text{Ca}(\text{NO}_3)_2$ , $0.00036$ M $(\text{NH}_4)_2\text{HPO}_4$ , $0.1$ M $\text{NaNO}_3$ / $0.025$ M $\text{Ca}(\text{NO}_3)_2$ , $0.015$ M $(\text{NH}_4)_2\text{HPO}_4$ $0.1$ M $\text{NaNO}_3$                 | $1$ mA/cm <sup>2</sup>                                                 | $100$ °C        | 2 h                 | 6        | 1.67        | [S6] |

\* The Ca/P ratio shown in the table is the best value obtained in the article.

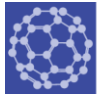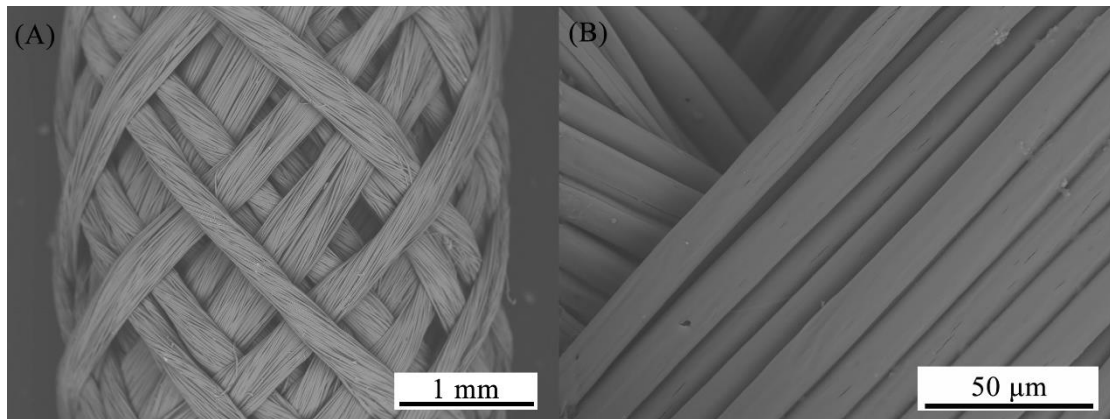

**Figure S1.** Surface morphology of undeposited braids, (A) SEM image of  $\times 40$  magnifications (B) SEM image of  $\times 1000$  magnifications.

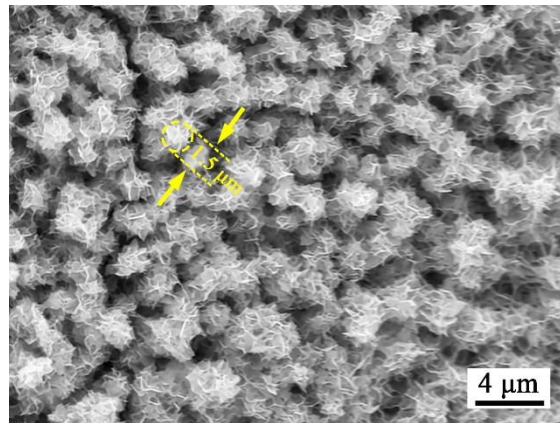

**Figure S2.** HA Crystal Diameter at 60 min Electrodeposition.

## References

- [S1] Cotrut, C.M.; Vladescu, A.; Dinu, M.; Vranceanu, D.M. Influence of deposition temperature on the properties of hydroxyapatite obtained by electrochemical assisted deposition. *Ceramics International* **2017**, *44*, 669–677
- [S2] Vladescu, A.; Vranceanu, D.M.; Kulesza, S.; Ivanov, A.N.; Bramowicz, M.; Fedonnikov, A.S.; Braic, M.; Norkin, I.A.; Koptuyg, A.; Kurtukova, M.O.; et al. Influence of the electrolyte's pH on the properties of electrochemically deposited hydroxyapatite coating on additively manufactured Ti64 alloy. *Scientific Reports* **2017**, *7*, 16819.
- [S3] Fathyunes, L.; Khalil-Allafi, J. Effect of employing ultrasonic waves during pulse electrochemical deposition on the characteristics and biocompatibility of calcium phosphate coatings. *Ultrasonics Sonochemistry*. **2018**, *42*, 293–302.
- [S4] Liu, Q.; Zhang, C.; Bao, Y.; Dai, G. Carbon fibers with a nano-hydroxyapatite coating as an excellent biofilm support for bioreactors. *Applied Surface Science* **2018**, *443*, 255–265.
- [S5] Marashi-Najafi, F.; Khalil-Allafi, J.; Etminanfar, M.R. Biocompatibility of hydroxyapatite coatings deposited by pulse electrodeposition technique on the Nitinol superelastic alloy. *Materials Science and Engineering: C* **2017**, *76*, 278–286.
- [S6] Pang, S.M.; He, Y.; He, P.; Luo, X.S.; Guo, Z.Z.; Li, H. Fabrication of two distinct hydroxyapatite coatings and their effects on MC3T3-E1 cell behavior. *Colloids and Surfaces B-Biointerfaces* **2018**, *171* 40–48.
